# Supplementary material
Source: PubMed Central journal article supplement (PMC6424635)
Supplement: NIHMS1519740-supplement-1.pdf [file NIHMS1519740-supplement-1.pdf]

### Supplemental Figure 1.

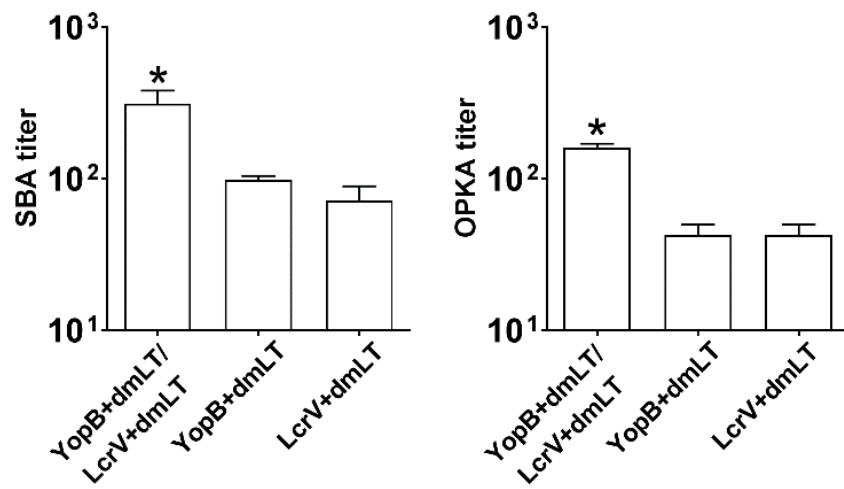

### Supplemental Figure 1. Functional antimicrobial activity of YopB and LcrV antibodies.

Adult mice were immunized as described in Fig. 1B. Equivalent volumes of serum from mice vaccinated with YopB+dmLT or LcrV+dmLT (10 per group) were pooled, and SBA and OPKA titers were measured in the individual or combined pools, as described in Materials and Methods. Data represent mean ± SEM titers from 2 independent assays. Significant differences among groups were determined by 1way ANOVA with Tukey's multiple comparisons test; \*,  $P < 0.05$  compared to YopB+dmLT and LcrV+dmLT vaccination.
